# Supplementary material for: A genetic and virulence characterization of Brazilian strains of Mycoplasma hyopneumoniae
Source: Front Microbiol. 2023 Nov 22;14:1280588. doi: 10.3389/fmicb.2023.1280588 (PMC10702778; doi:10.3389/fmicb.2023.1280588)
Supplement: Supplementary file 3 [file Table_3.DOCX]

Table S3: Detection of *Mycoplasma hyopneumoniae* DNA fragment copies in laryngeal swab, tracheobronchial lavage, and lesioned tissue of pigs experimentally inoculated with UFV01 and UFV02 isolates.

|  | **Laryngeal swab** | | | | | | | | **LTB** | **Tissue** |
| --- | --- | --- | --- | --- | --- | --- | --- | --- | --- | --- |
| **Groups** | **ID** | **-7** | **0** | **07 dpi** | **14 dpi** | **21 dpi** | **28 dpi** | **35 dpi** | **35 dpi** | **35 dpi** |
|  | **A** | **-** | **-** | **-** | **-** | **-** | **-** | **-** | **-** | **-** |
|  | **B** | **-** | **-** | **-** | **-** | **-** | **-** | **-** | **-** | **-** |
|  | **C** | **-** | **-** | **-** | **-** | **-** | **-** | **-** | **-** | **-** |
| **NC** | **D** | **-** | **-** | **-** | **-** | **-** | **-** | **-** | **-** | **-** |
|  | **Average** | **0** | **0** | **0** | **0** | **0** | **0** | **0** | **0** | **0** |
|  | **% Positives** | **0%** | **0%** | **0%** | **0%** | **0%** | **0%** | **0%** | **0%** | **0%** |
|  | **X** | **-** | **-** | **-** | 2.29x103 | 1.09x102 | 3.94x103 | 0.00 | 1.32x104 | 1.61x104 |
|  | **F** | **-** | **-** | **-** | 2.72x102 | 1.22x104 | 3.26x103 | 4.42x102 | 7.76x106 | 1.35x107 |
|  | **G** | **-** | **-** | **-** | 4.81x102 | 1.70x103 | 1.80x103 | 5.79x104 | 2.32x106 | 8.95x106 |
|  | **H** | **-** | **-** | **-** | **-** | 3.77x102 | 5.34x103 | 1.25x104 | 6.77x104 | 1.14x107 |
|  | **I** | **-** | **-** | **-** | **-** | **-** | 5.71x101 | 2.87x104 | 1.89x105 | 1.41x106 |
|  | **J** | **-** | **-** | **-** | 1.38x102 | 2.59x102 | 4.65x102 | 7.37x102 | 2.14x105 | 7.98x103 |
|  | **K** | **-** | **-** | **-** | 1.03x104 | 1.05x103 | 5.35x102 | 4.82x103 | 5.01x105 | 2.14x105 |
| **UFV01** | **L** | **-** | **-** | **-** | 1.05x102 | 4.36x102 | 1.07x103 | 2.25x104 | 6.16x105 | 3.85x106 |
|  | **Average** | **0** | **0** | **0** | **3.76x102** | **4.36x102** | **1.44x103** | **1.25x104** | **3.57x105** | **2.63x106** |
|  | **% Positives** | **0%** | **0%** | **0%** | **75%** | **87.50%** | **100%** | **87.50%** | **100%** | **100%** |
|  | **M** | **-** | **-** | **-** | **-** | 1.47x104 | 4.20x103 | 4.40x103 | 2.08x106 | 6.31x106 |
|  | **N** | **-** | **-** | **-** | 6.27x102 | 1.46x102 | 4.63x104 | 8.53x103 | 6.32x106 | 6.11x105 |
|  | **O** | **-** | **-** | **-** | **-** | - | 4.45x102 | 2.42x103 | 8.40x105 | 6.91x106 |
|  | **P** | **-** | **-** | **-** | **-** | 1.50x103 | 7.82x102 | 2.43x103 | 1.89x106 | 3.92x106 |
|  | **Q** | **-** | **-** | **-** | 1.82x102 | 1.66x102 | 4.72x105 | 3.00x105 | 1.27x107 | 3.16x106 |
|  | **R** | **-** | **-** | **-** | 1.36x102 | 5.85x101 | 7.59x102 | 1.17x103 | 1.09x107 | 8.20x106 |
|  | **S** | **-** | **-** | **-** | **-** | 9.74x103 | 1.44x103 | 2.50x103 | 1.16x107 | 2.39x105 |
| **UFV02** | **T** | **-** | **-** | **-** | **-** | **-** | **-** | **-** | **-** | **-** |
|  | **Average** | **0** | **0** | **0** | **1.82x102** | **8.33x102** | **1.44x103** | **2.50x103** | **6.32x106** | **3.92x106** |
|  | **% Positives** | **0%** | **0%** | **0%** | **37.50%** | **75%** | **87.50%** | **87.50%** | **87.50%** | **87.50%** |

Negative (-), Positive (+).

Table 02: Efficiency of diluted standard curves for qPCR analyses.

| Fluor | Eficiência % | Slope | Y-Intercept | R2 |
| --- | --- | --- | --- | --- |
| FAM | 101,73 | -3,281 | 42,733 | 1,000 |
| FAM | 101,22 | -3,293 | 42,596 | 0,997 |
| FAM | 98,62 | -3,355 | 43,682 | 1,000 |
| FAM | 99,22 | -3,341 | 43,858 | 0,993 |
| FAM | 101,46 | -3,287 | 43,020 | 0,994 |
| FAM | 99,96 | -3,323 | 43,631 | 0,998 |
